# Supplementary material
Source: PubMed Central journal article supplement (PMC5761677)
Supplement: NIHMS923954-supplement-supplement_1.pdf [file NIHMS923954-supplement-supplement_1.pdf]

**Supporting Information:**

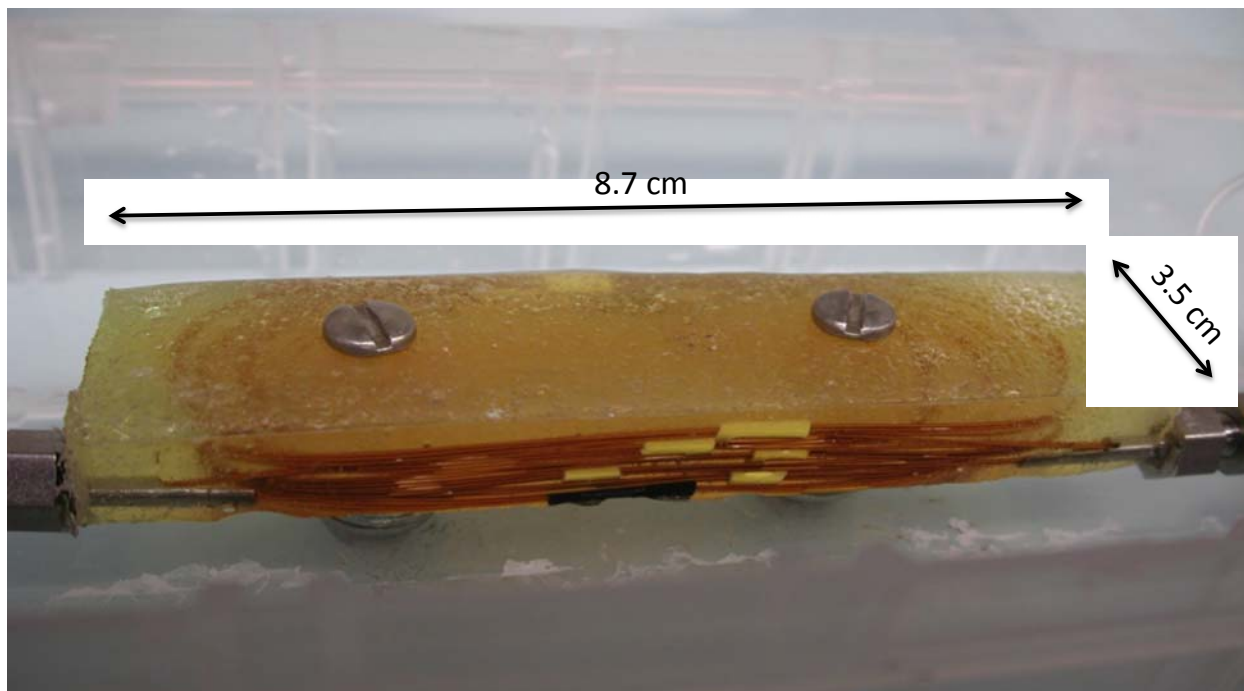

Figure S1: A photograph of a six capillary multi-PLOT-cryo module equipped with compression fittings for use as a headspace vapor collection device.
